# Supplementary material
Source: publisher site journal article supplement (https://www.dovepress.com/article/483977)
Supplement: Supplementary file 1 [file get_supplementary_file.php]

**Figure S1. (A-B) The samples were divided into gene clusterA (n=177) and gene clusterB (n=235) by unsupervised clustering based on DEGs (K=2).**


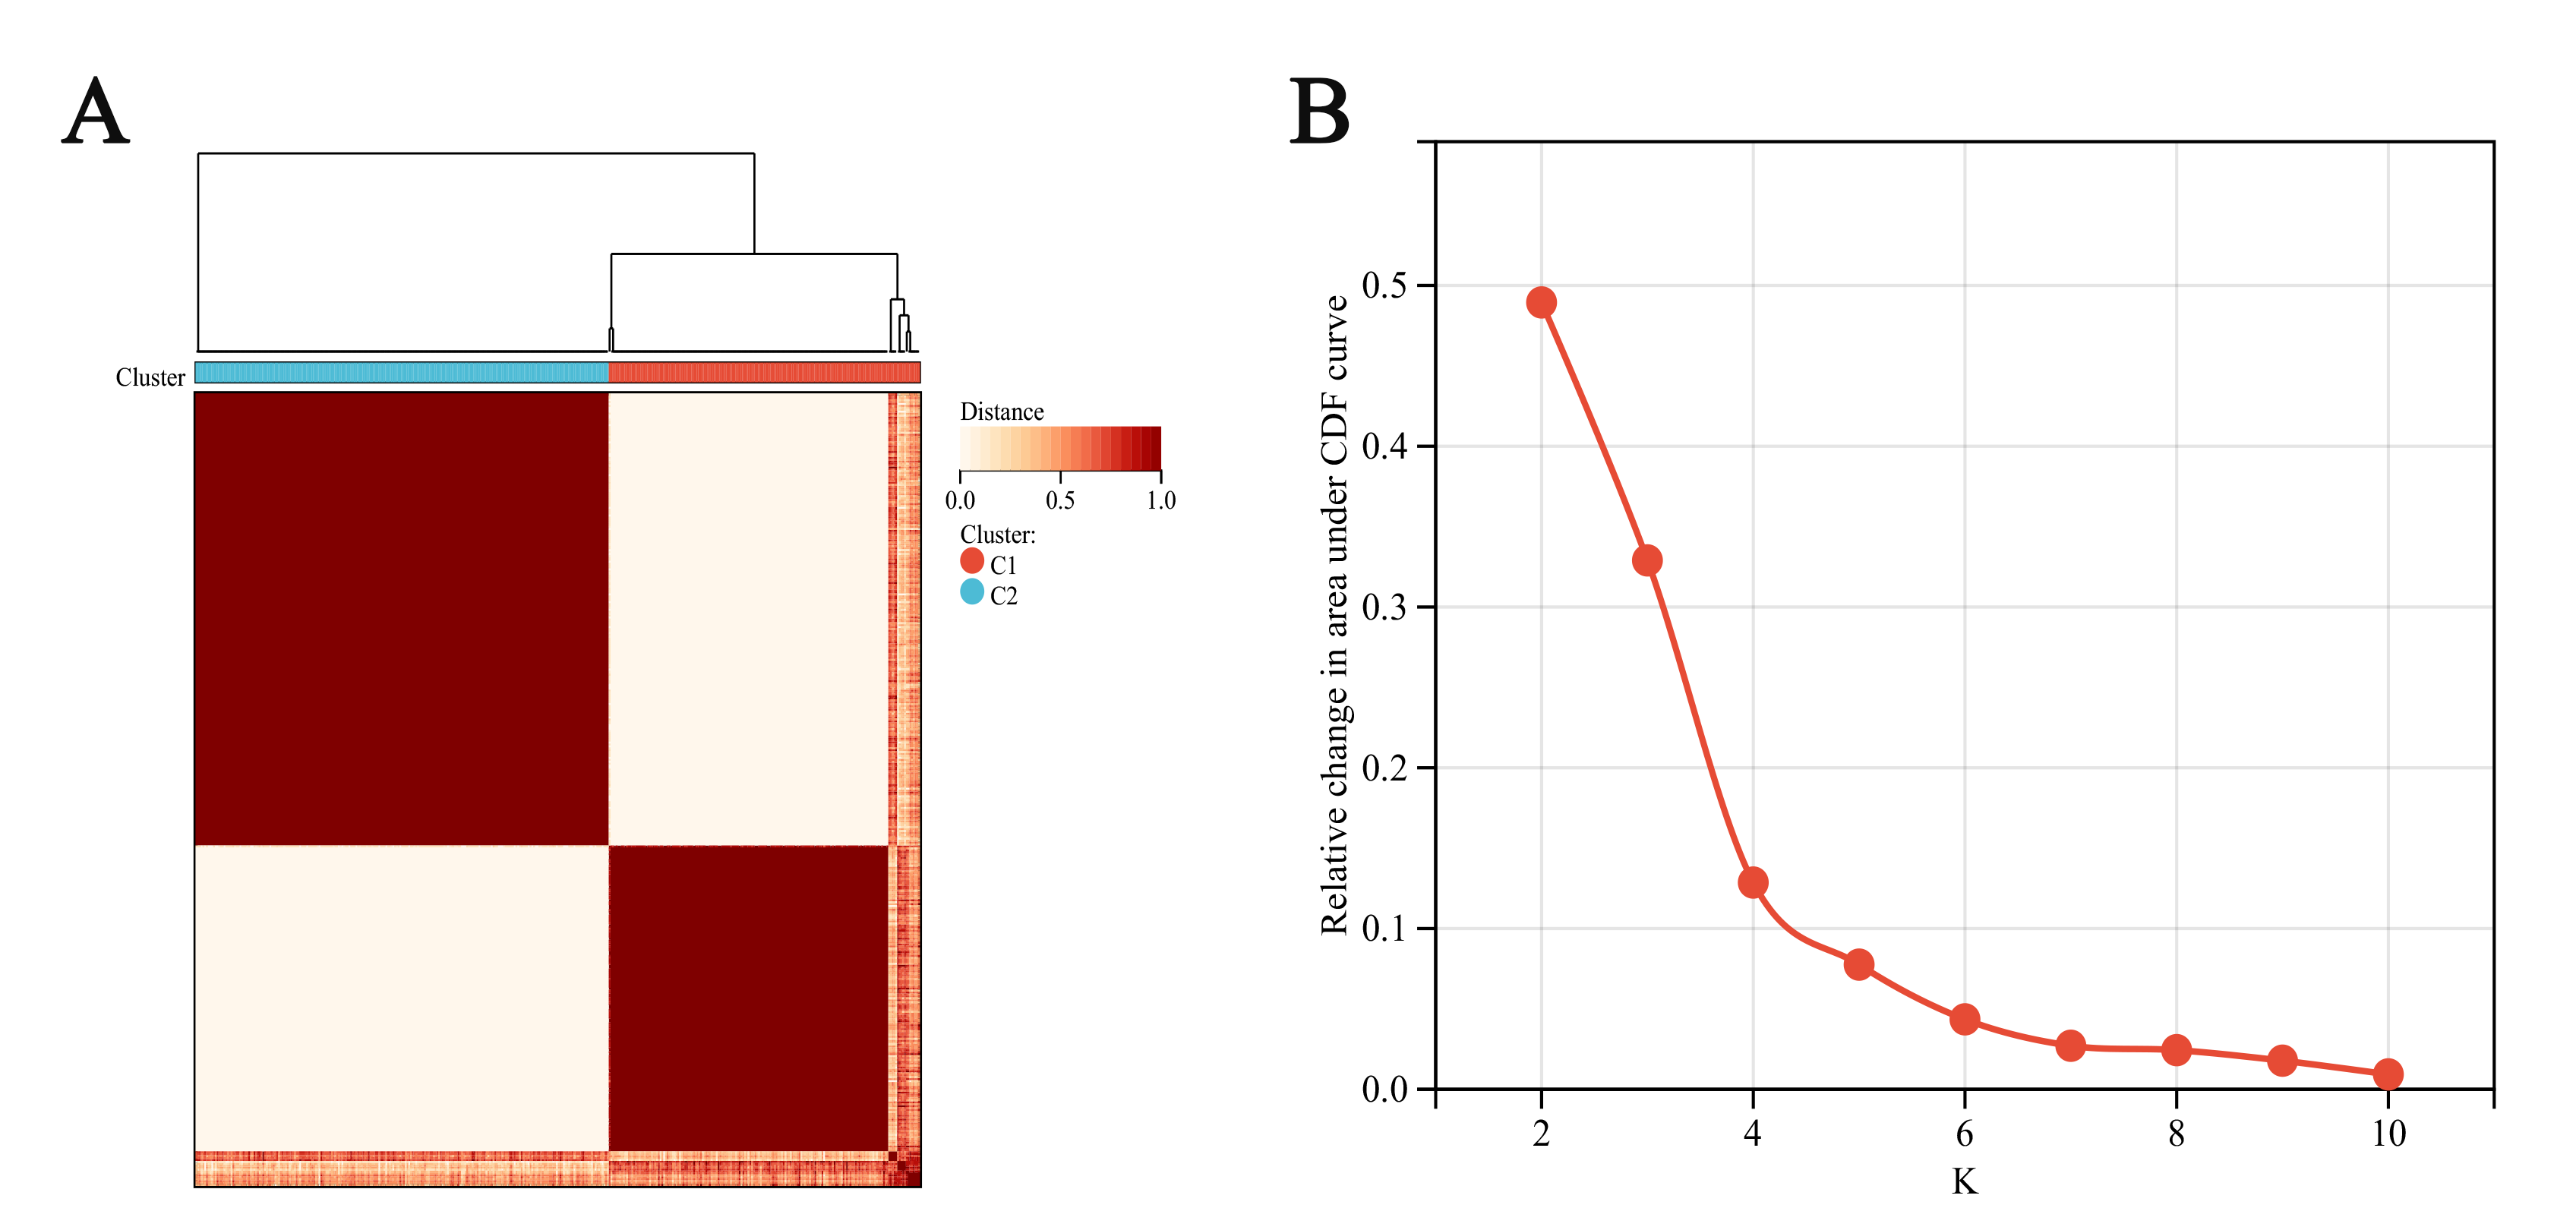


**Figure S2. WB original blots in supplementary information. (A) GAPDH 37kda. (B) CXCL13 13kda.**

**A**


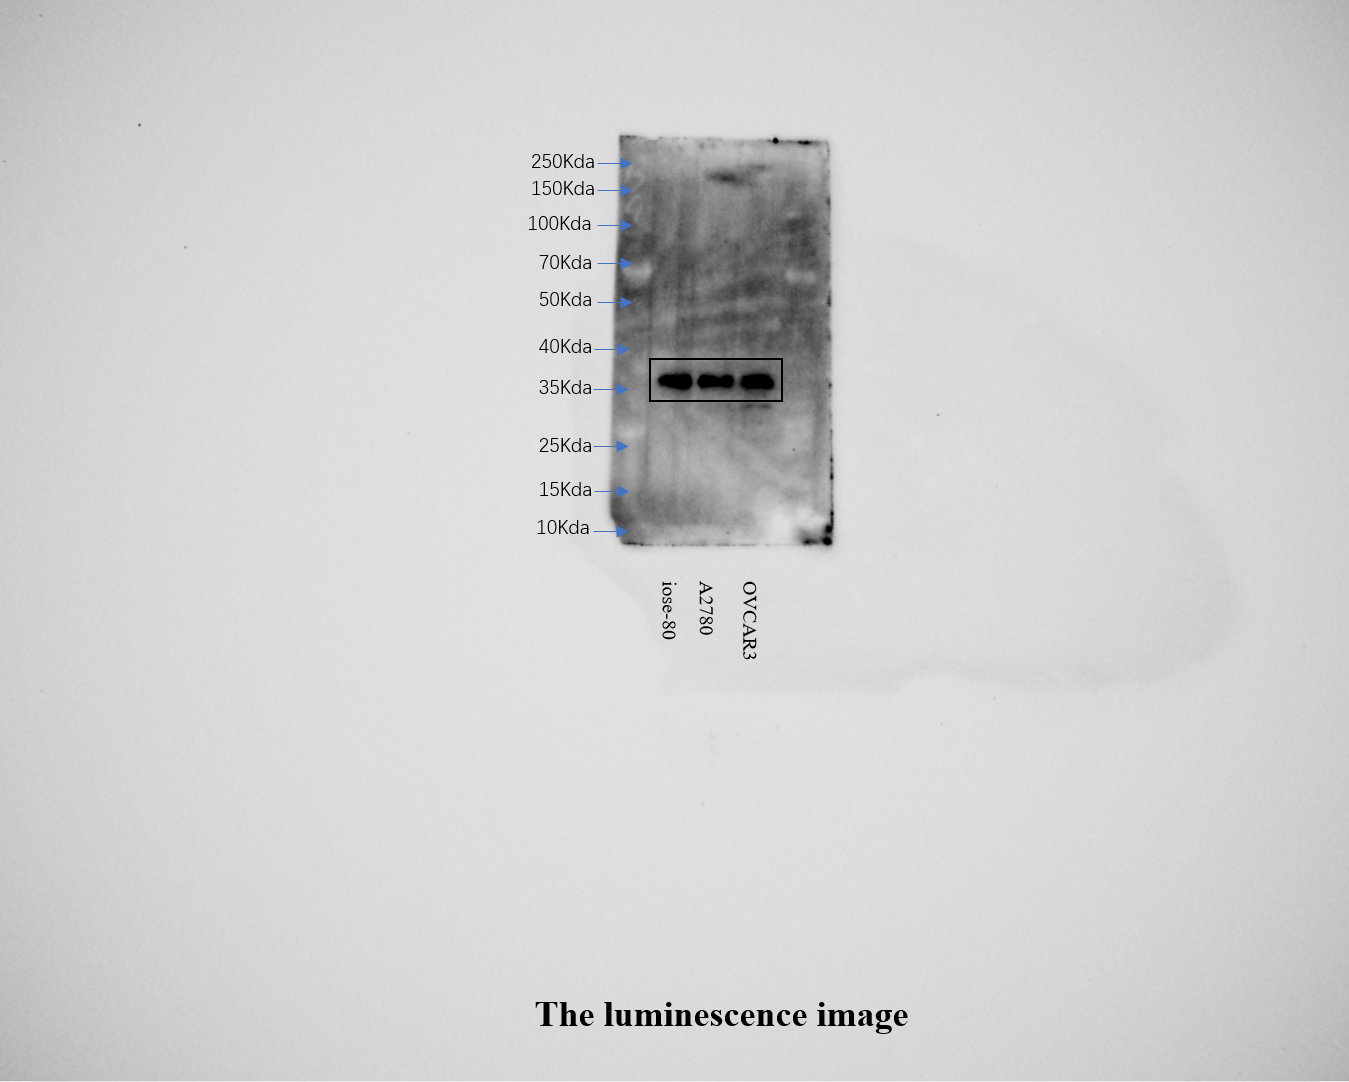

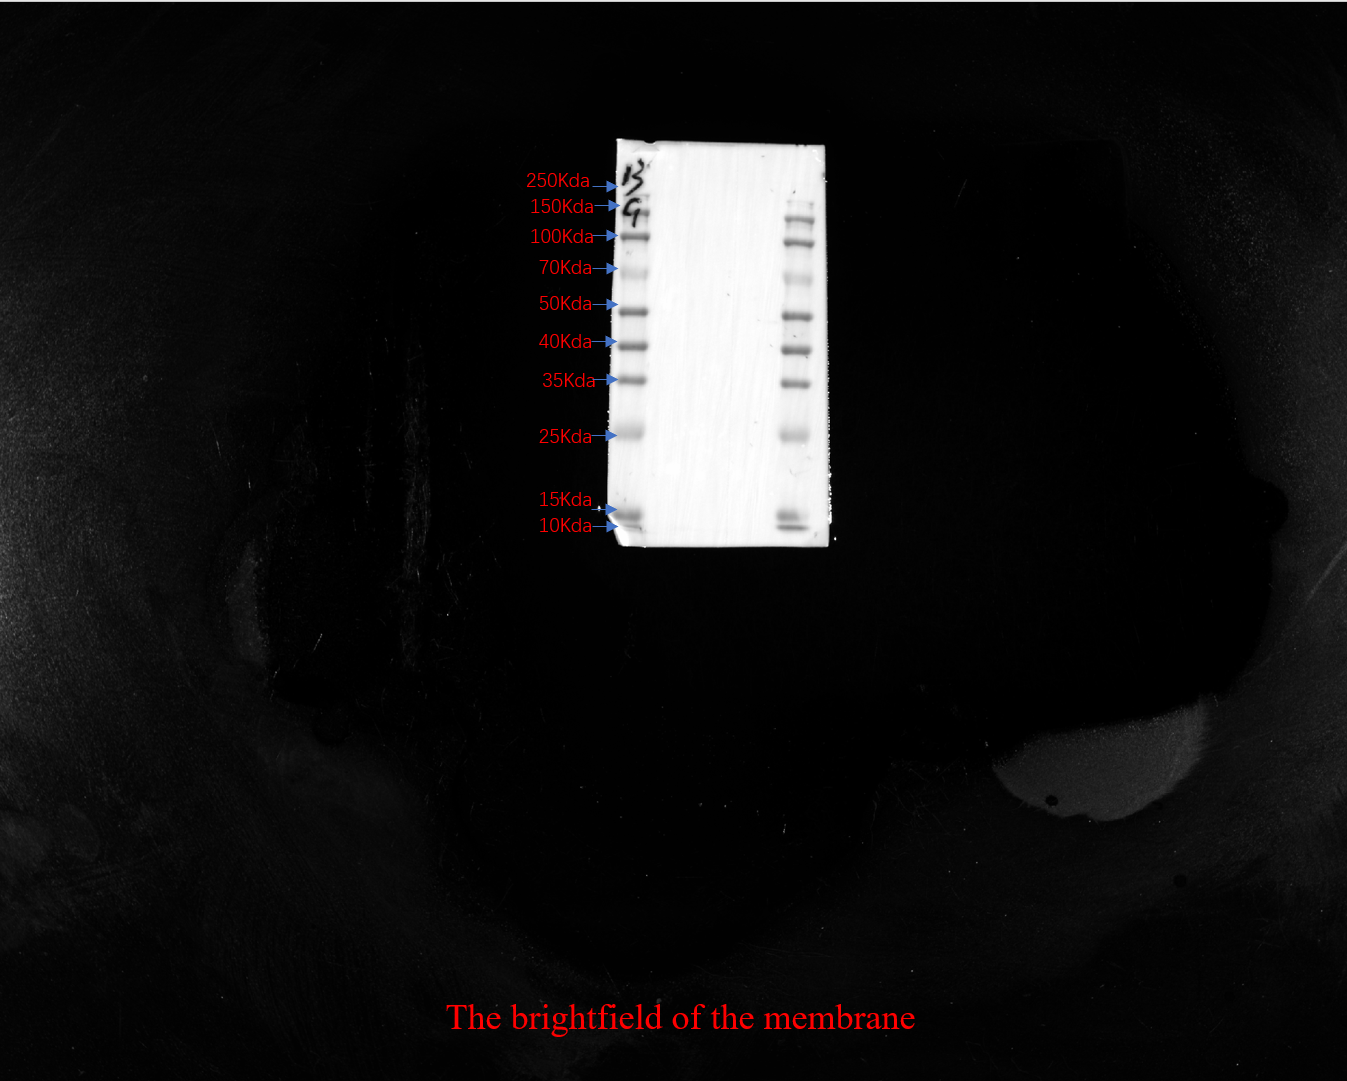

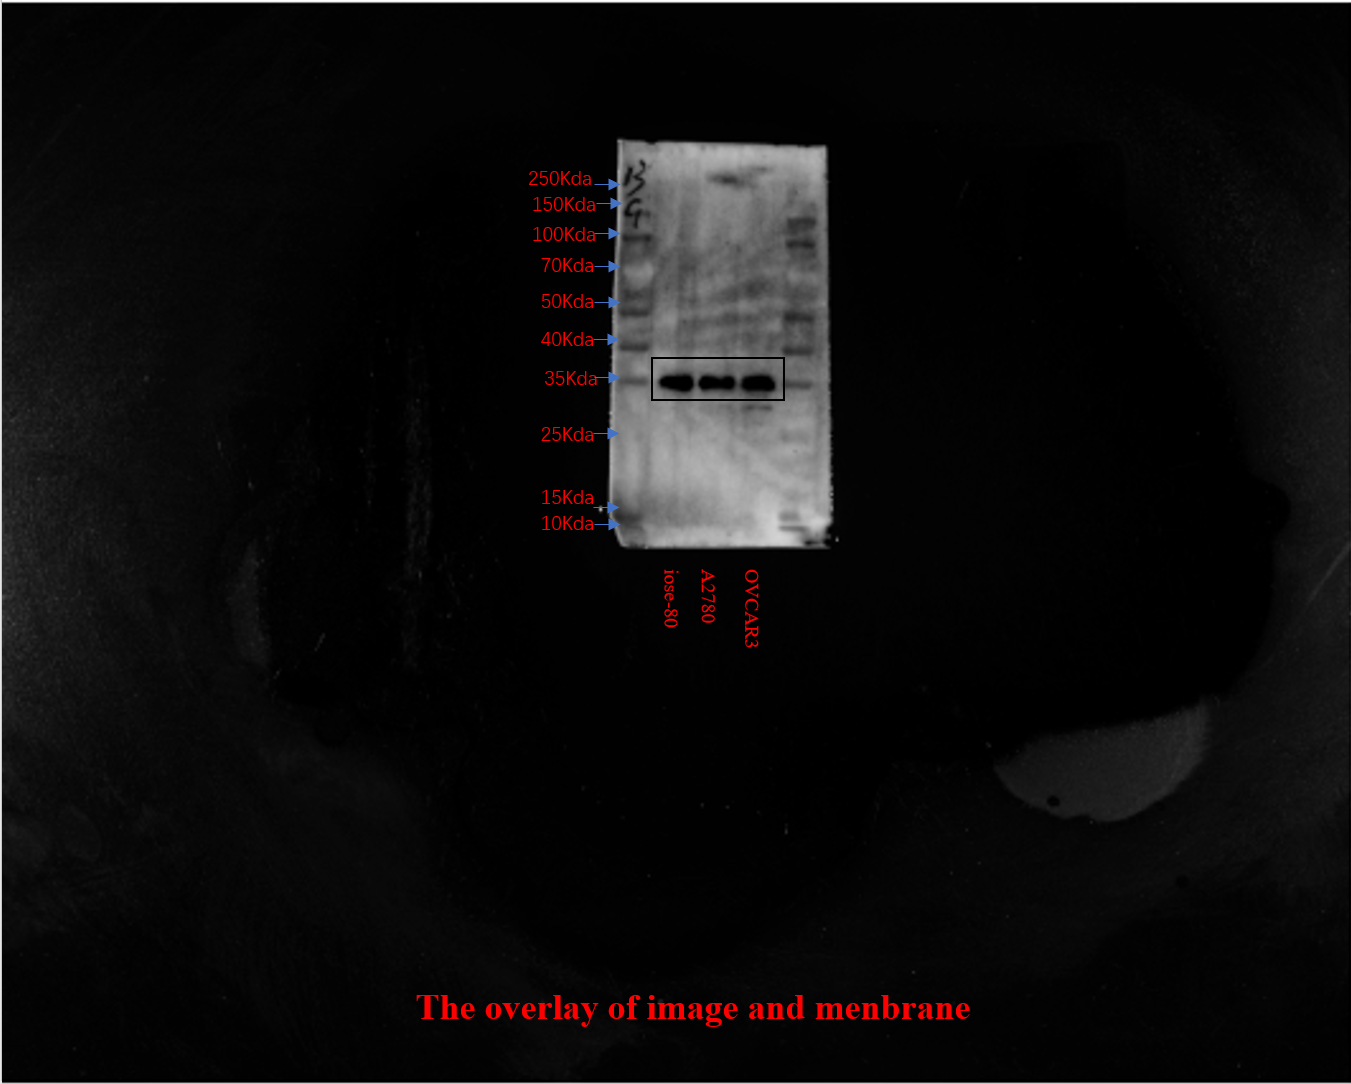


B


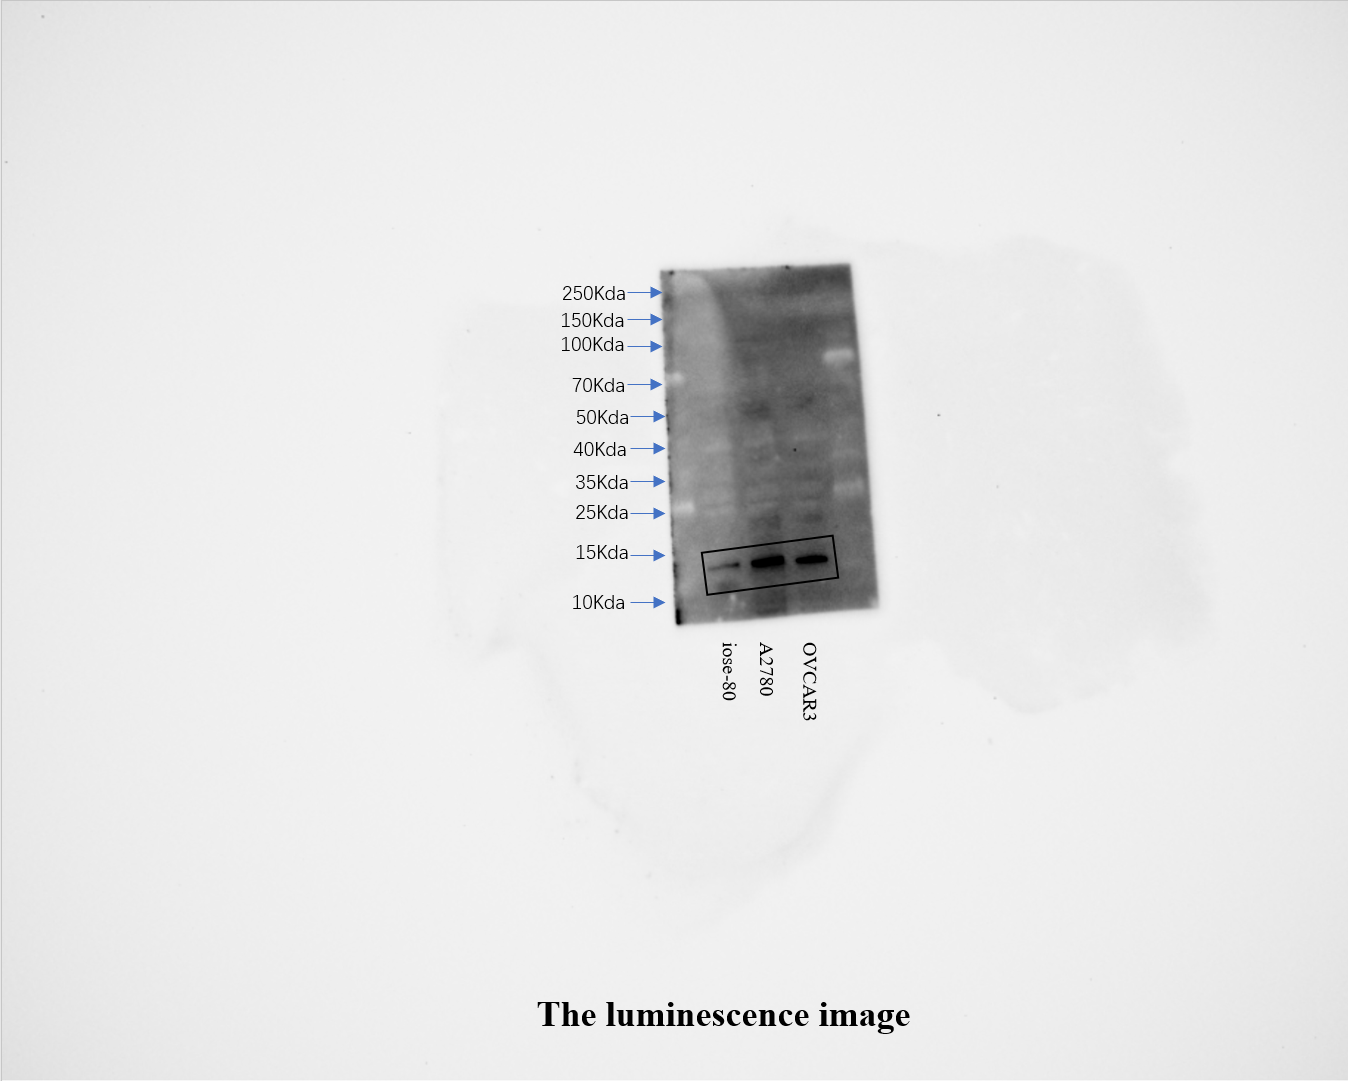

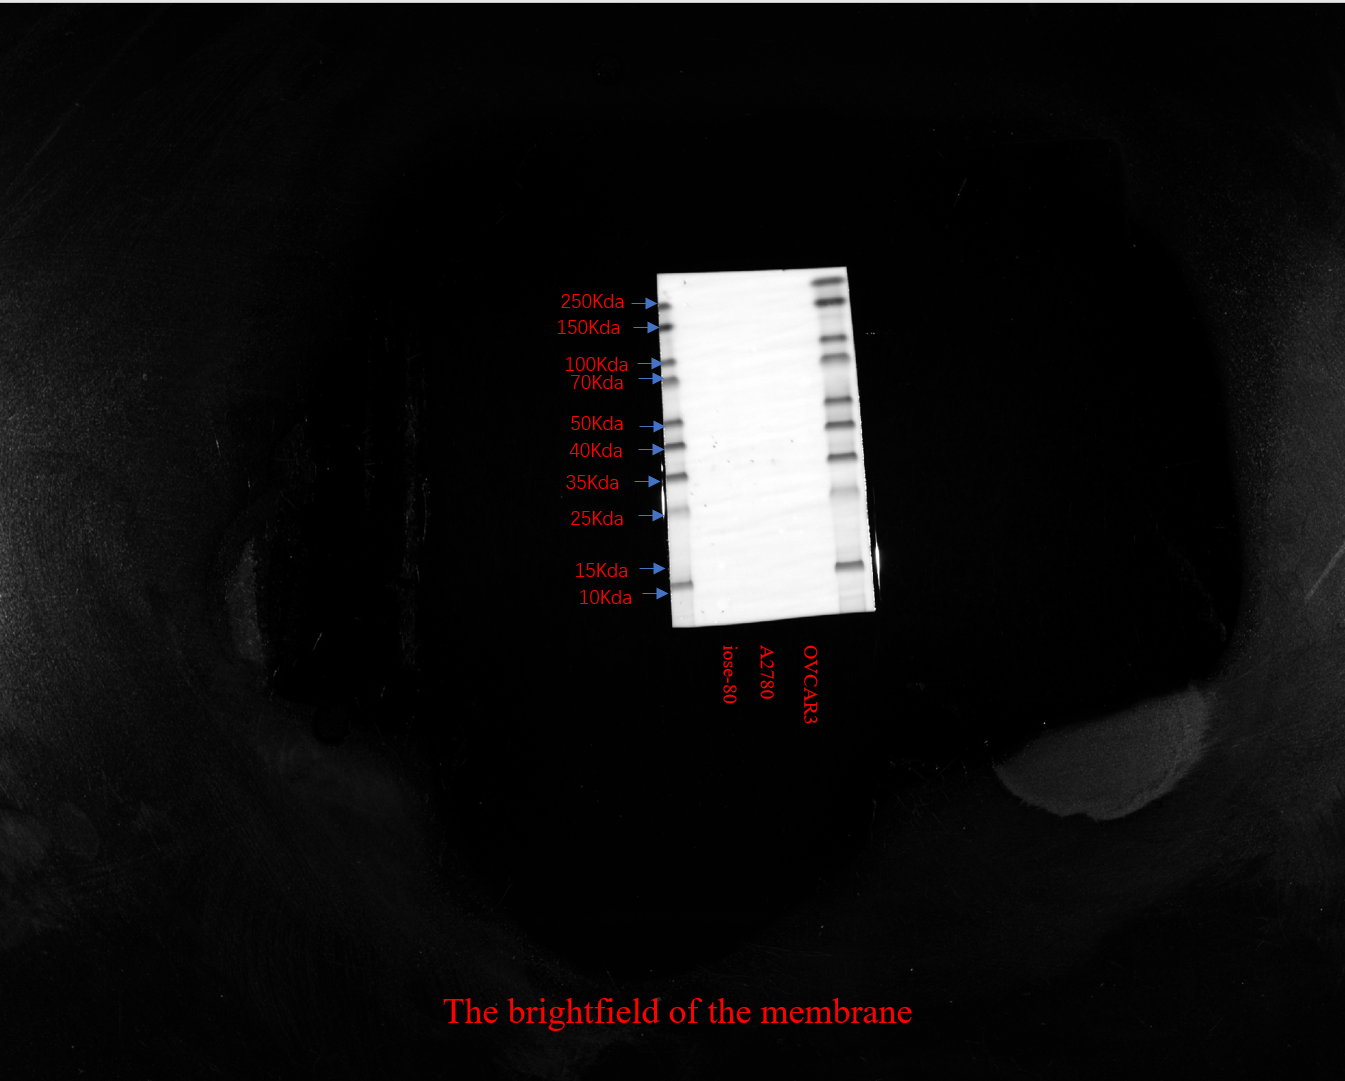


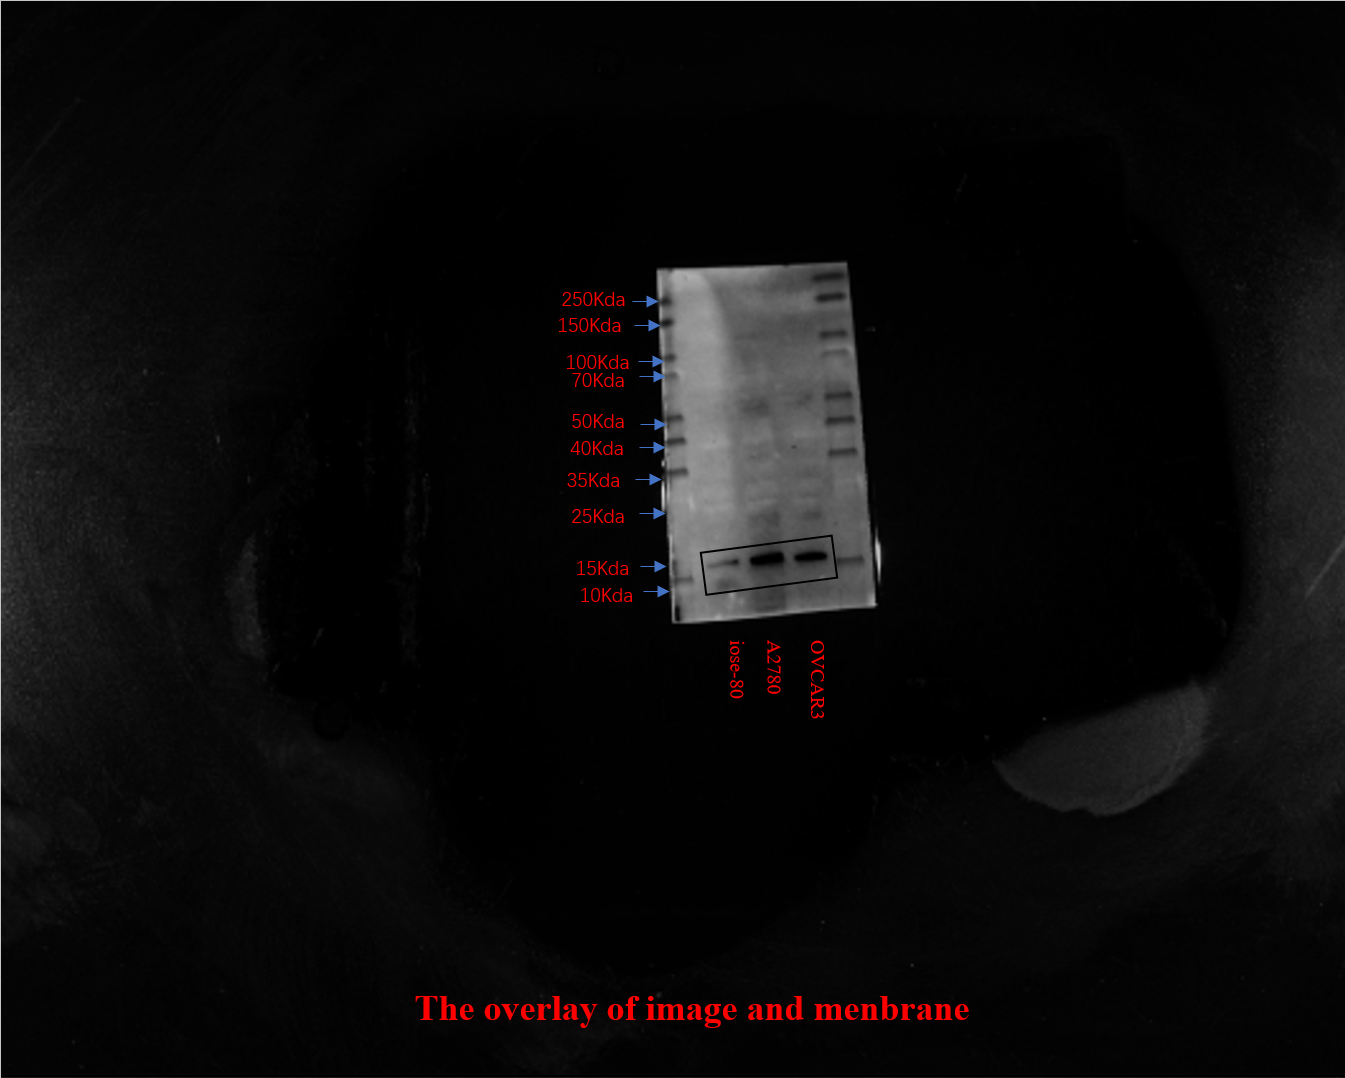


| **Table S1. The PANoptosis-related genes (PRGs).** | | | |
| --- | --- | --- | --- |
| CASP8 | FADD | CASP6 | NLRP3 |
| TAB2 | TAB3 | PSTPIP2 | TNFAIP3 |
| CASP7 | PARP1 | GSDMD | MLKL |
| IRF1 | AIM2 | ZBP1 | CASP1 |
| RIPK1 | RIPK3 | TRADD |  |
